# Supplementary material
Source: publisher figshare collection journal article supplement (https://acs.figshare.com/ndownloader/files/25921657)
Supplement: Supplementary file 1 [file 25921657]

*Supporting Information*

Selective p-doping of 2D WSe<sub>2</sub> *via* UV/ozone  
treatments and its application in field-effect  
transistors

Sujeong Yang<sup>#</sup>, Geonyeop Lee<sup>#</sup>, and Jihyun Kim<sup>\*</sup>

Department of Chemical and Biological Engineering, Korea University, Seoul 02841, Korea

<sup>#</sup>These authors contributed equally to this work.

<sup>\*</sup>Corresponding author; E-mail: hyunhyun7@korea.ac.kr

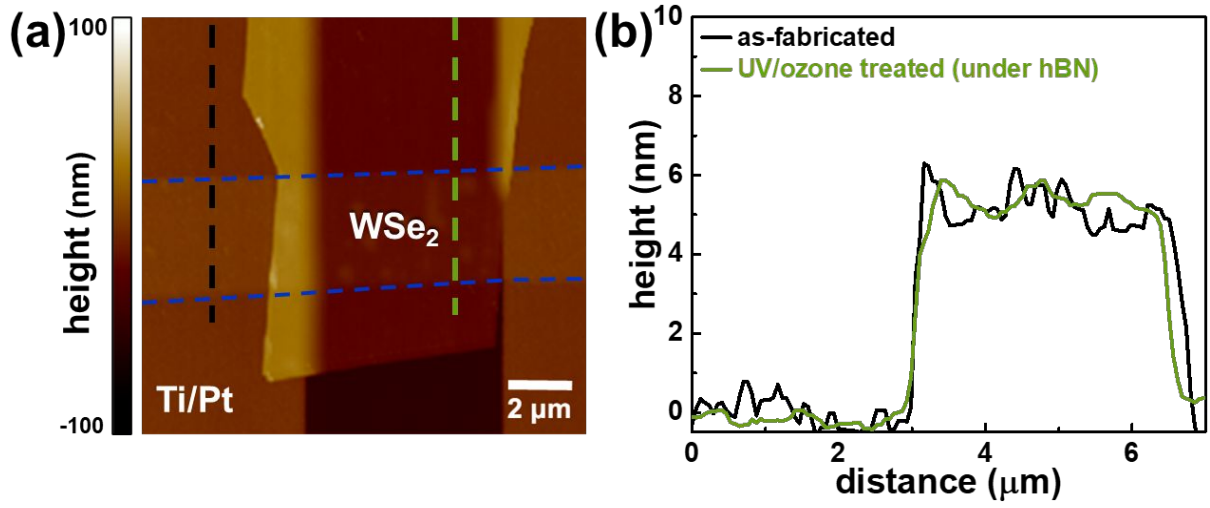

**Figure S1** (a) AFM image of the 2D WSe<sub>2</sub>-based FET which corresponds to Fig. 2(a). (b) AFM height profile of the WSe<sub>2</sub> in the as-fabricated 2D WSe<sub>2</sub>-based FET (black-dotted line in Figs. S1(a) and 2(a)) and hBN-encapsulated WSe<sub>2</sub> after UV/ozone treatment (green-dotted line in Fig. S1(a)).

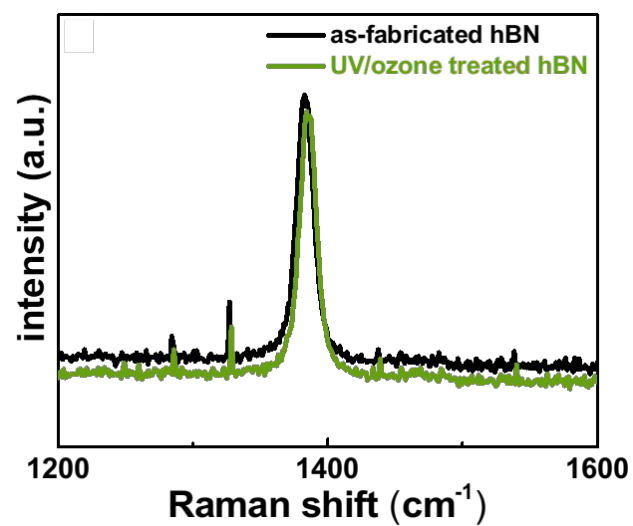

**Figure S2** Raman spectra of hBN before and after the UV/ozone treatment for 180 min at 100 °C

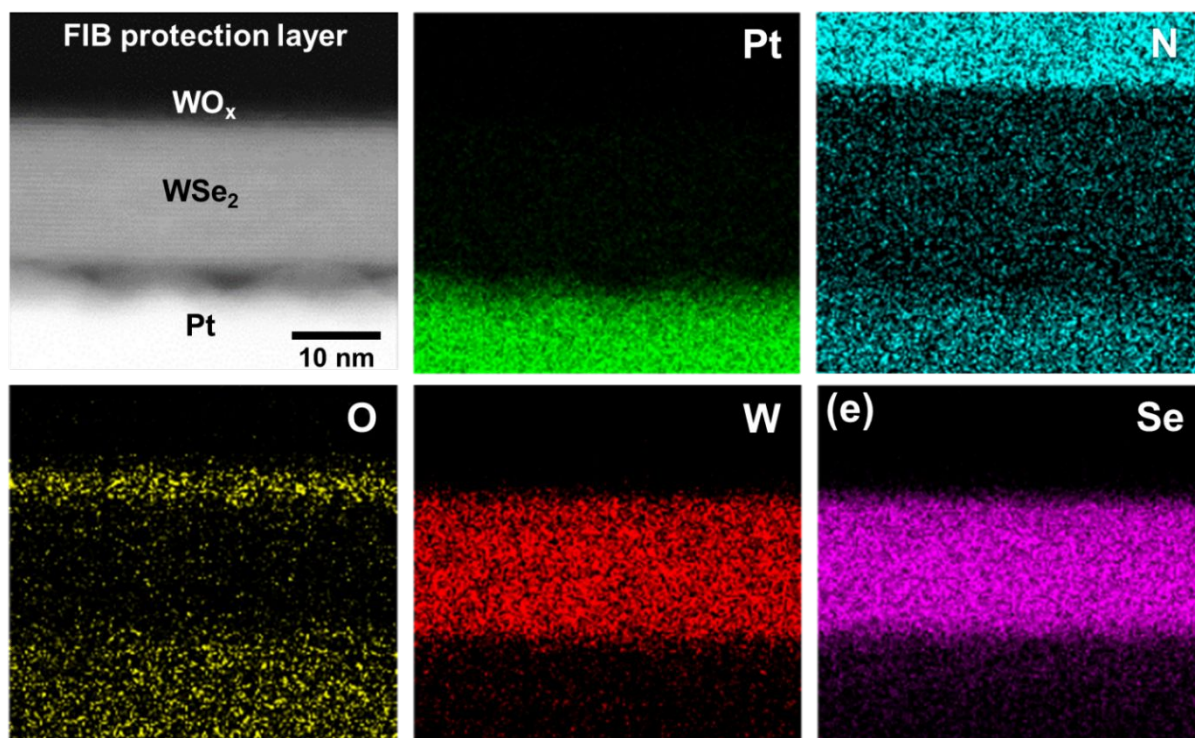

**Figure S3** Cross-sectional TEM and corresponding EDS mapping images

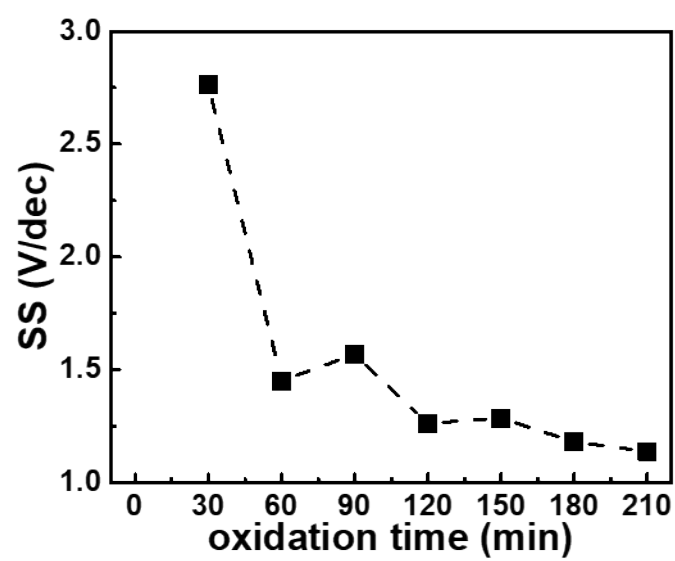

**Figure S4** Subthreshold swing (SS) of the 2D WSe<sub>2</sub>-based FET at varying UV/ozone treatment times
